# Supplementary material
Source: publisher figshare collection journal article supplement (https://gsapubs.figshare.com/ndownloader/files/23299400)
Supplement: Supplementary file 1 [file 23299400]

## Sheet: Sheet1
Sample Depth	δ18O	δ13C	δ11B	±2σ	B/Ca	Na/Ca	Mg/Ca	Mn/Ca	Sr/Ca
(m)	(‰)	(‰)	(‰)		(µmol/mol)	(mmol/mol)	(mmol/mol)	(µmol/mol)	(mmol/mol)
21.6408	-2.15	3.79004	20.64	0.22	101.156	6.01799	5.89804	1.55639	7.41002
23.4696	-3.49	2.15896	20.94	0.22	63.2665	3.51246	6.54966	1.93521	4.93344
24.9936	-3.6	-0.792071	23.11	0.2	28.3821	1.47555	22.3993	5.1107	1.97288
27.7368	-4.68	-0.572316	16.72	1.83	2.52389	0.246482	18.7313	21.7339	1.56624
34.1376	-3.9	0.463552	23.39	0.2	31.9632	1.58311	17.7269	5.42463	2.38606
37.1856	-3.87	-0.234181	20.09	0.5	11.2384	0.704046	19.8541	5.10763	1.84409
39.624	-3.53	-1.15273	19.13	0.32	9.3126	0.850339	18.3086	8.53365	1.55615
46.0248	-4.24	-0.455273	20.27	0.24	11.4182	0.622825	9.96503	4.25922	1.73293
52.4256	-3.94	-0.688263	17.86	0.35	6.6166	0.442026	12.943	6.00558	2.06824
55.1688	-3.88	-0.219571	21.75	0.23	15.842	0.621189	10.444	4.20187	2.49226
55.4736	-2.54	-0.864922	21.1	0.19	17.957	0.795497	10.5258	1.7209	3.08903
73.152	-3.99	0.364324	14.92	0.29	6.00286	0.467189	12.1502	6.70715	1.50112
85.344	-3.76	-0.0947274	14.85	1.27	3.83827	0.358151	15.0569	8.30934	1.60716
91.44	-3.67	0.993493	15.58	0.62	3.74134	0.366917	13.9898	6.31066	1.3401
97.8408	-3.73	0.487216	15.09	0.46	4.60498	0.292256	16.7513	11.0427	1.20388
103.632	-3.9	-0.117267	14.45	0.49	6.55045	0.364684	20.9702	13.3621	1.58588
109.728	-3.78	-0.26791	19.47	0.3	2.79125	0.372607	17.0043	4.6789	2.23568
119.888	-2.77	-0.377789	16.76	0.49	5.05649	0.467877	24.5596	13.3504	1.71202
120.396	-1.79	0.67342	16.45	0.43	5.11566	0.378072	22.7079	12.6739	1.71566
149.479	-0.337245	1.75348	22.913	0.229759	54.3958	1.80985	52.0753	14.3039	2.39805
174.041	0.955132	2.08275	20.5319	0.234523	43.6956	1.54052	79.3	14.7593	1.33127
